# Supplementary material for: A new graphene-based nanomaterial increases lipolysis and reduces body weight gain through integrin linked kinase (ILK)
Source: Royal Society of Chemistry journal article supplement (doi:10.1039/d2bm01791a), 2023-01-01

### A new graphene-based nanomaterial increases lipolysis and reduces body weight gain through integrin linked kinase (ILK)

S. de Frutos <sup>1,2,\*</sup>, Mercedes Griera <sup>3</sup>, M.P. Lavín-López <sup>4</sup>, Martín Martínez-Rovira <sup>4</sup>, J.A Martínez-Rovira <sup>4</sup>, Manuel Rodríguez-Puyol <sup>1,2</sup>, Diego Rodríguez-Puyol <sup>5,2</sup>.

**SUPPLEMENTARY FIGURE:** GMC treatments did not change GLUT4 expression, activity or blood glycaemia. mRNA expression fold changes of GLUT4, normalized to  $\beta$ -actin, from A) differentiated adipocytes and B) scWAT explants from standard diet (STD)- fed wildtype mice (WT), cultured and treated with 20  $\mu$ g/mL GMC or vehicle (CT) for 24h. C) glucose uptake determination in other scWAT explants from STD-fed WT ex vivo: explants were incubated with insulin (100 nM) for 15 min and the fluorescent deoxyglucose analog 2-NBDG (0.1 mM) was added for additional 30 min and the intracellular 2-NBDG fluorescence fold change was determined afterwards. D) blood glycaemia from STD-fed rats after topical administration of GMC: rats were depilated in the dorsal-inguinal area and subjected to topical applications of 100  $\mu$ g/mL GMC or vehicle (VH) 2 times per day for 5 consecutive days. Data are expressed as mean  $\pm$  standard errors (M $\pm$ SEM) from n=12 experiments.

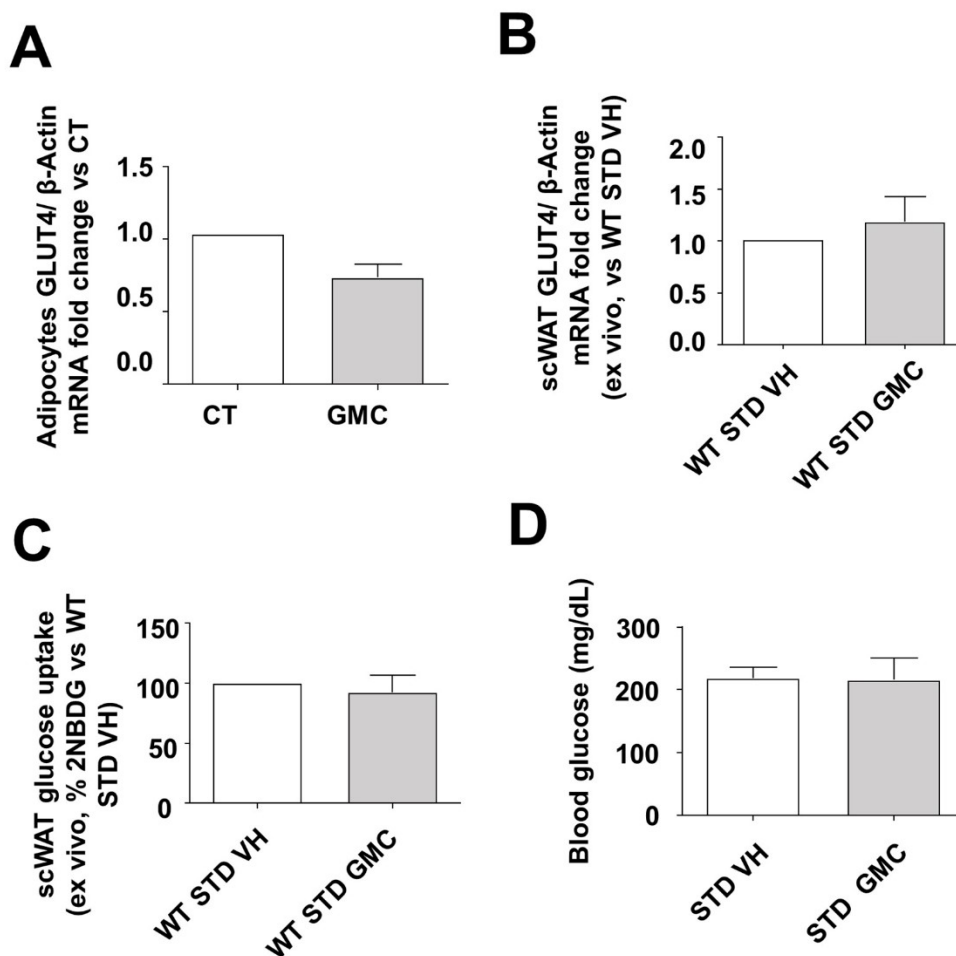

Supplement: d2bm01791a1.pdf [file d2bm01791a1.pdf]
